# Supplementary material for: Effect of Natural Polysaccharide Matrix-Based Selenium Nanocomposites on Phytophthora cactorum and Rhizospheric Microorganisms
Source: MDPI journal article supplement (doi:10.3390/nano11092274), 2021-09-01
Supplement: s1 [file s1]

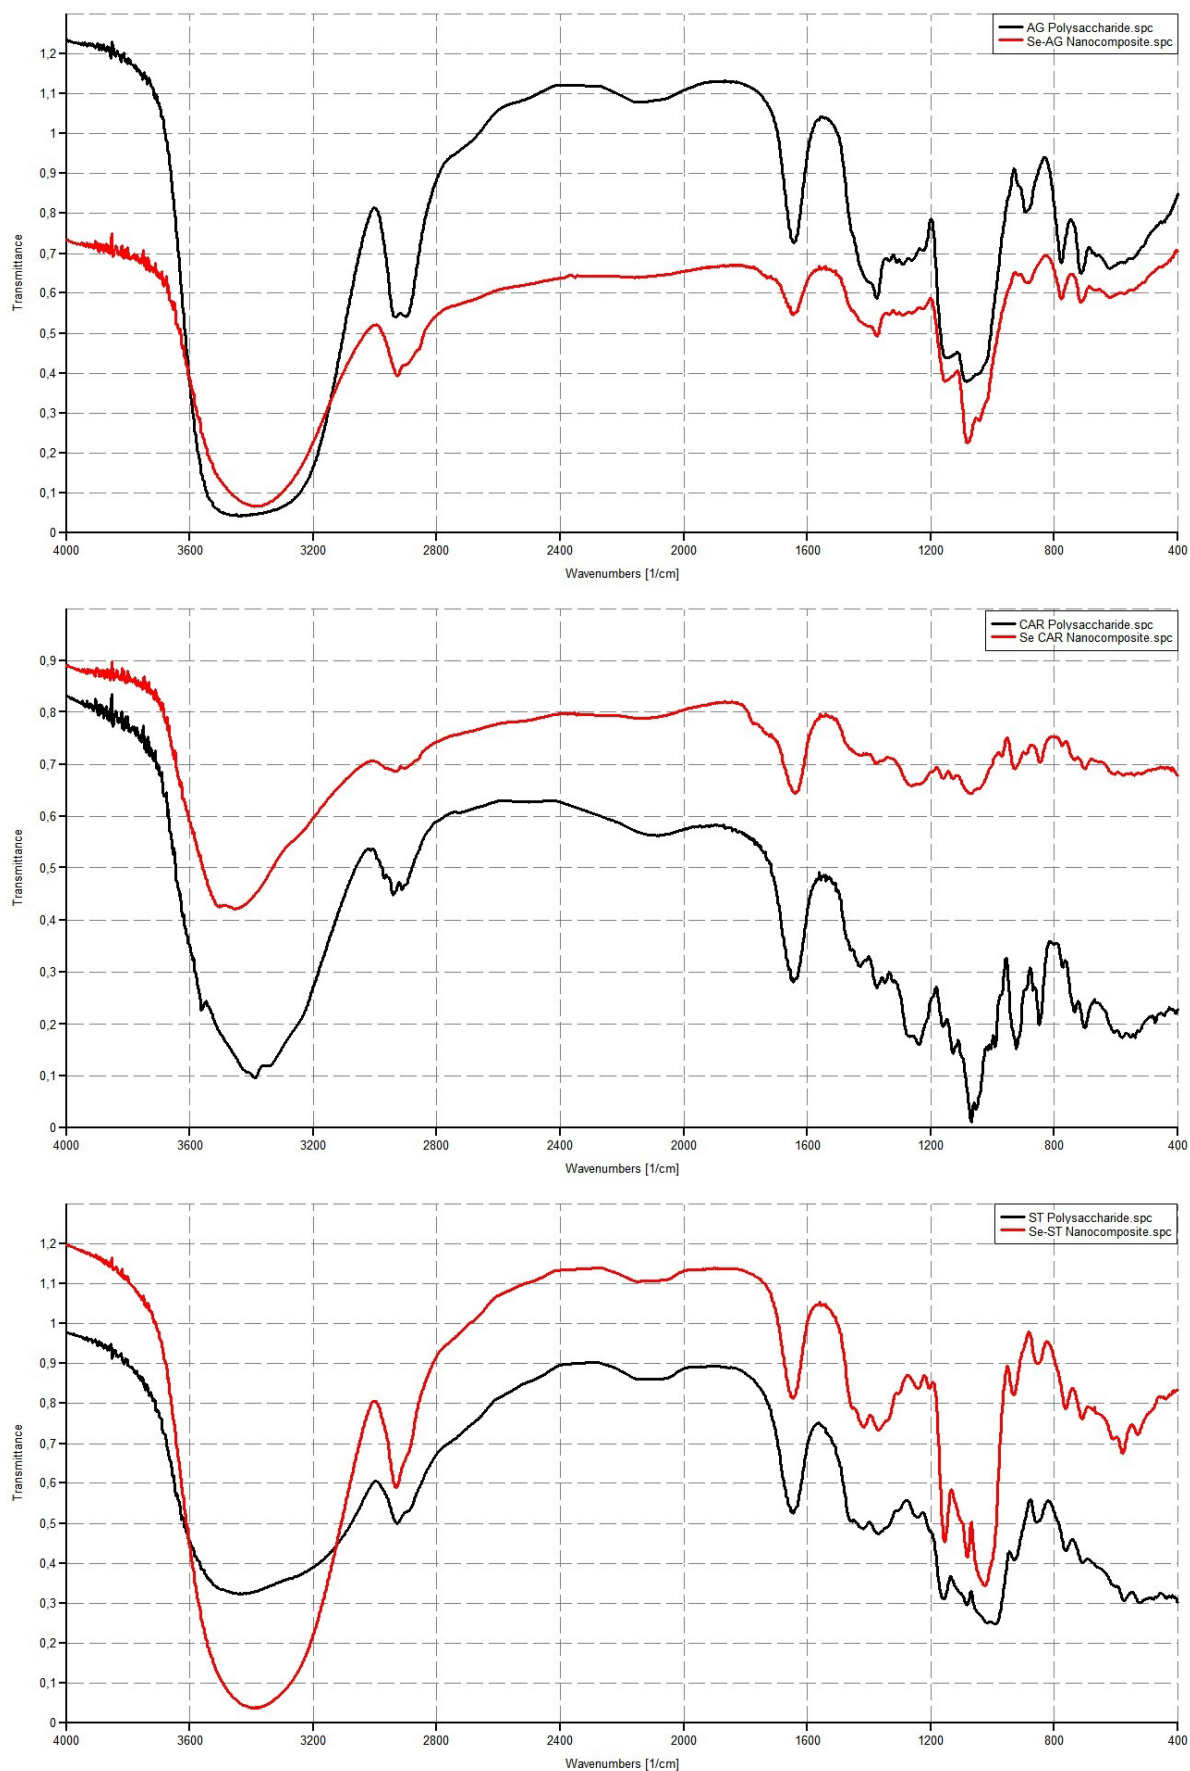

**Figure S1:** Fourier-transform infrared spectroscopy (FTIR) of all Se NCs and their polysaccharides in this study.
